# Supplementary material for: Chiral recognition during adsorption on MOF [{Cu12I(trz)8}·4 Cl·8 H2O]n, obtained from achiral building blocks without an external source of chirality
Source: Royal Society of Chemistry journal article supplement (doi:10.1039/d3nj01448g), 2023-01-01
Supplement: d3nj01448g1.pdf [file d3nj01448g1.pdf]

## Electronic Supplementary Information

### *Chiral recognition during adsorption on MOF $\{Cu_{12}I(trz)_8\} \cdot 4 Cl \cdot 8 H_2O\}_n$ , obtained from achiral building blocks without external source of chirality*

Yuliya F. Sharafutdinova, Ksenia S. Balandina, Irina N. Pavlova, Marat R. Agliullin, Vladimir Yu. Guskov

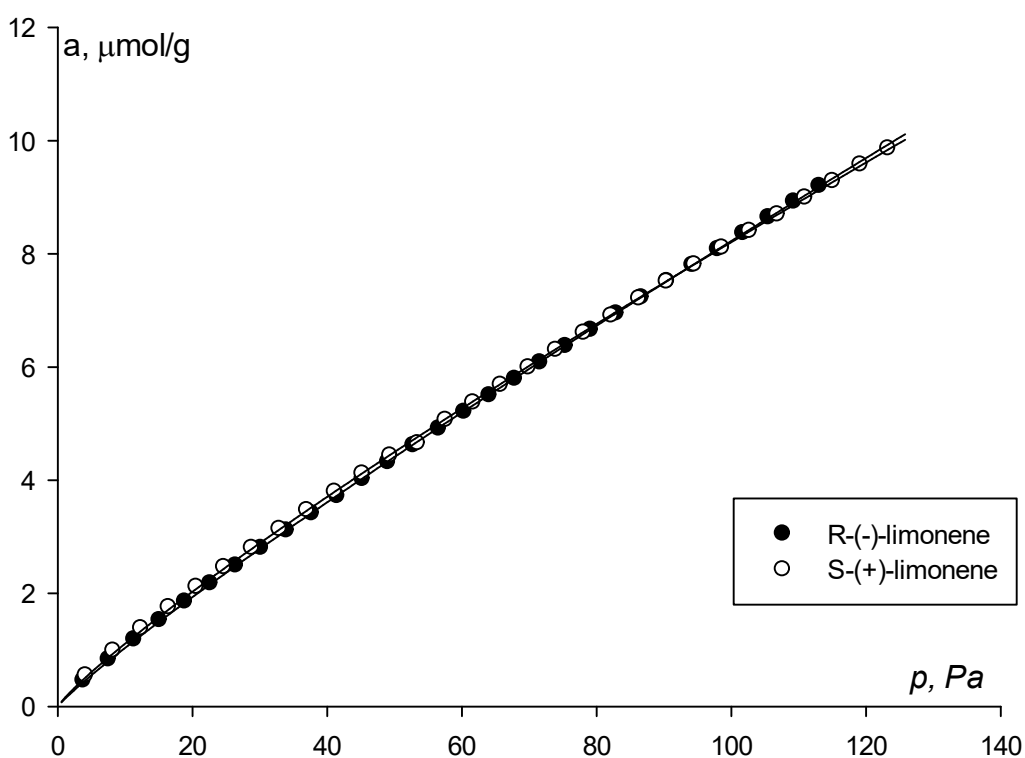

Figure 1S. Isotherms of limonene vapors adsorption at 90 °C

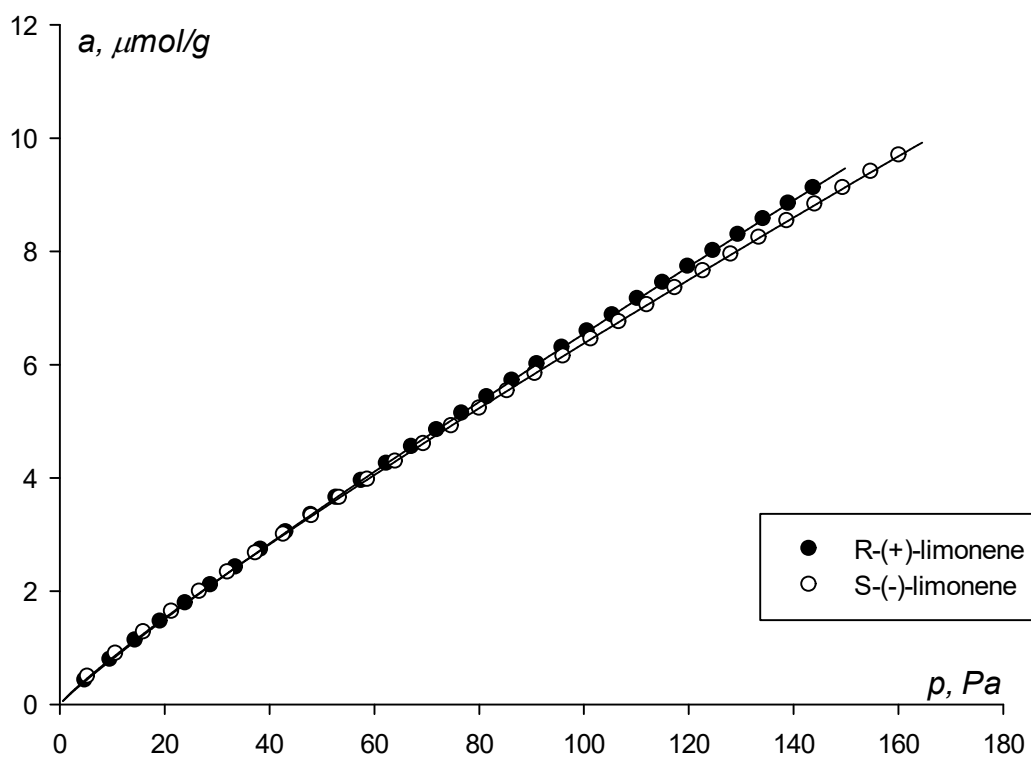

Figure 2S. Isotherms of limonene vapors adsorption at 100 °C

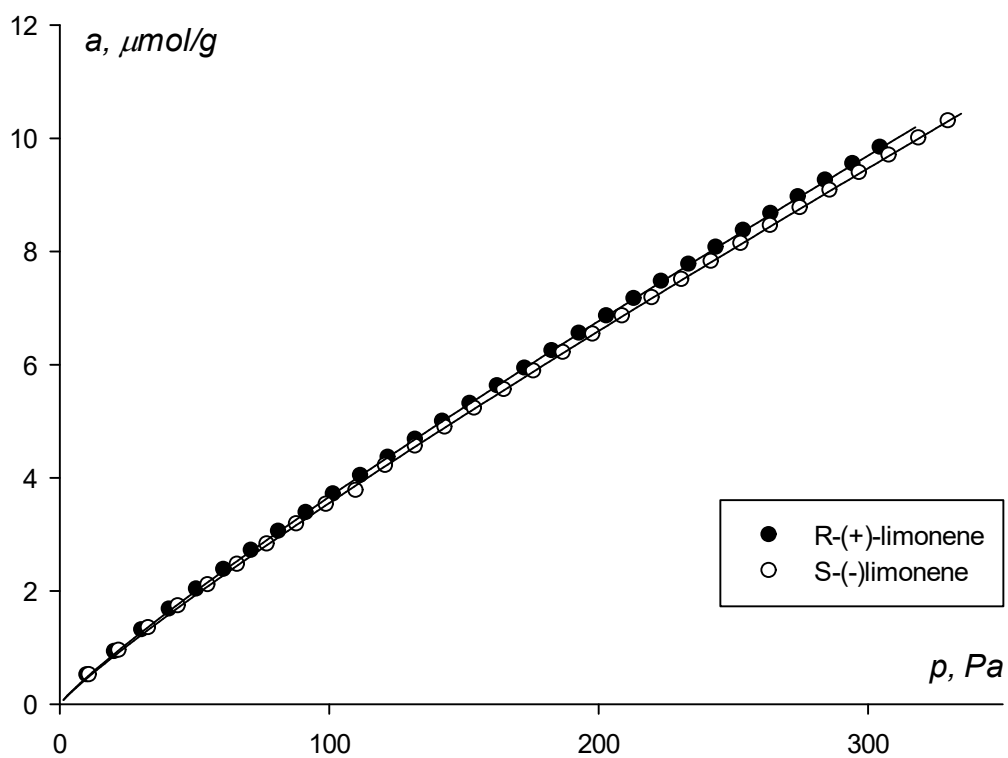

Figure 3S. Isotherms of limonene vapors adsorption at 120 °C

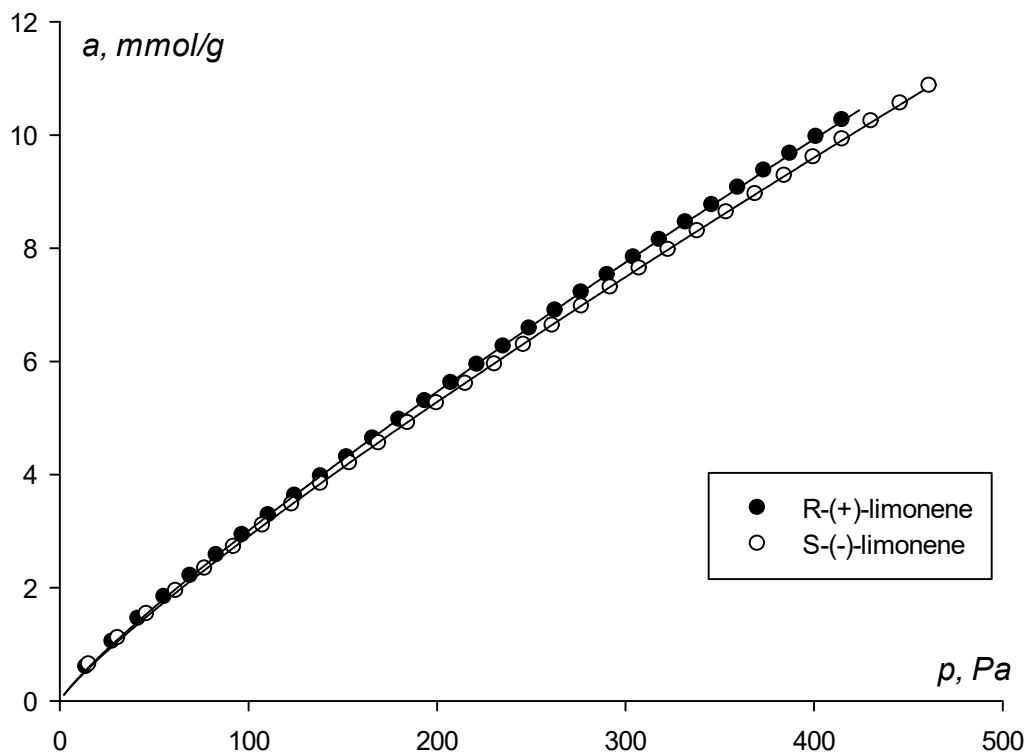

Figure 4S. Isotherms of limonene vapors adsorption at 130 °C

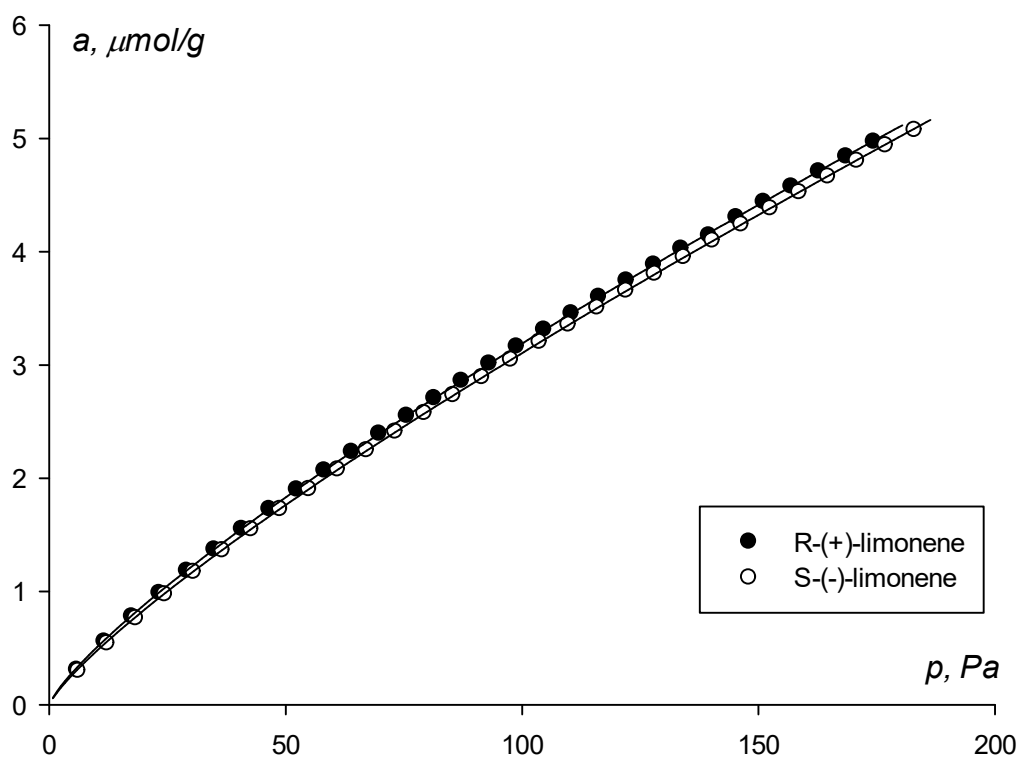

Figure 5S. Isotherms of limonene vapors adsorption at 140 °C

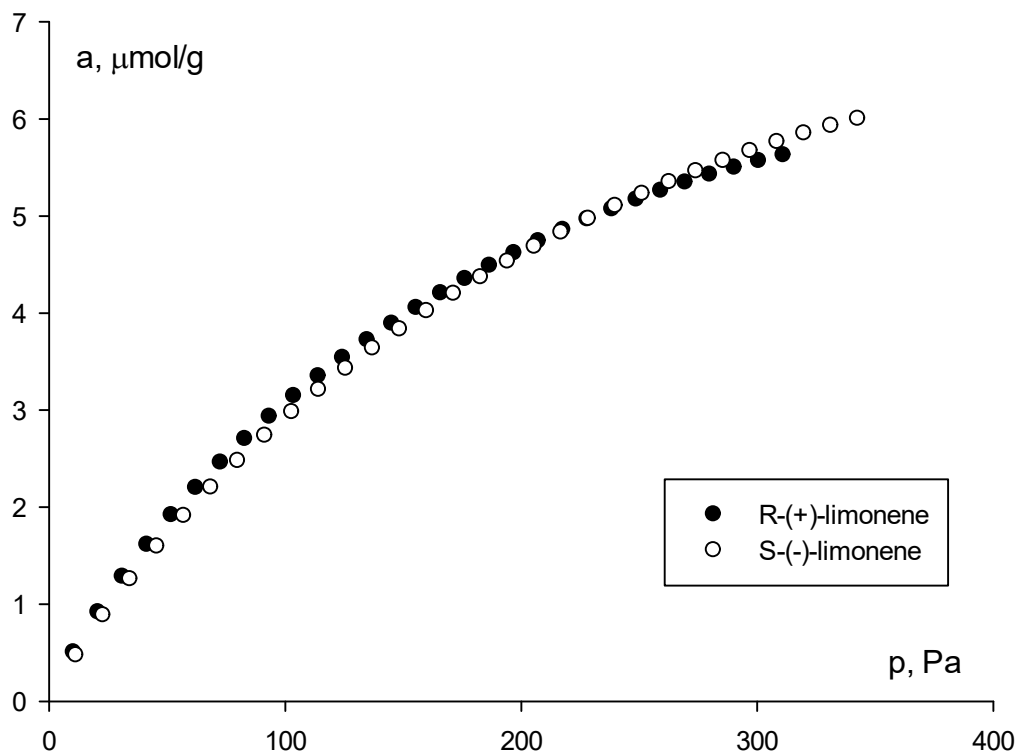

Figure 6S. Isotherms of limonene vapors adsorption at 110 °C

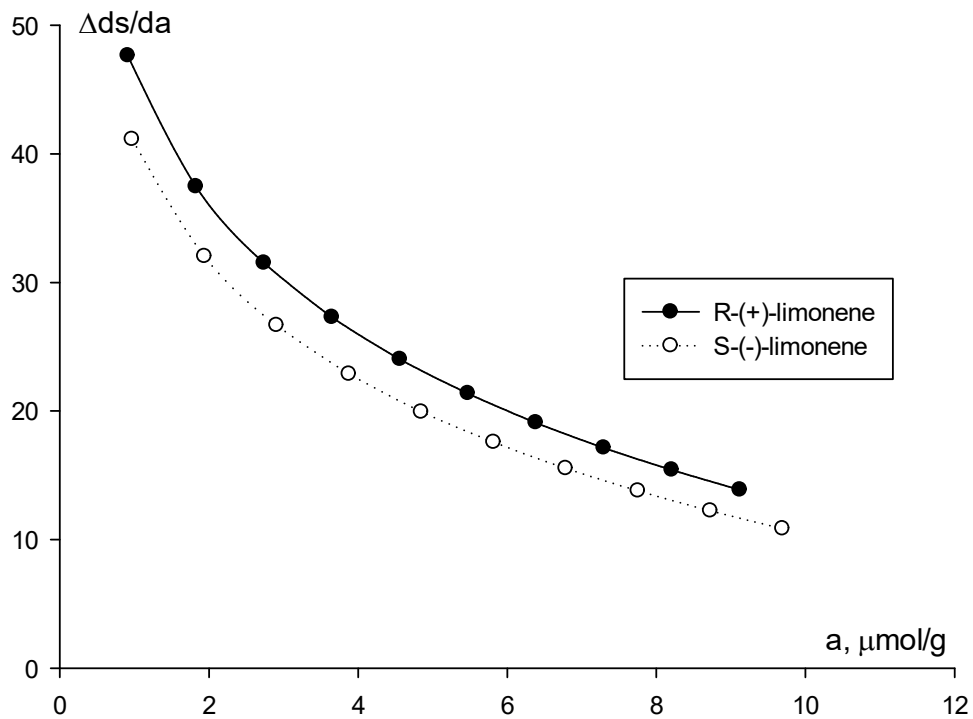

Figure 7S. Differential entropies of limonenes adsorption on CsCuCl<sub>3</sub> crystals at 90 °C

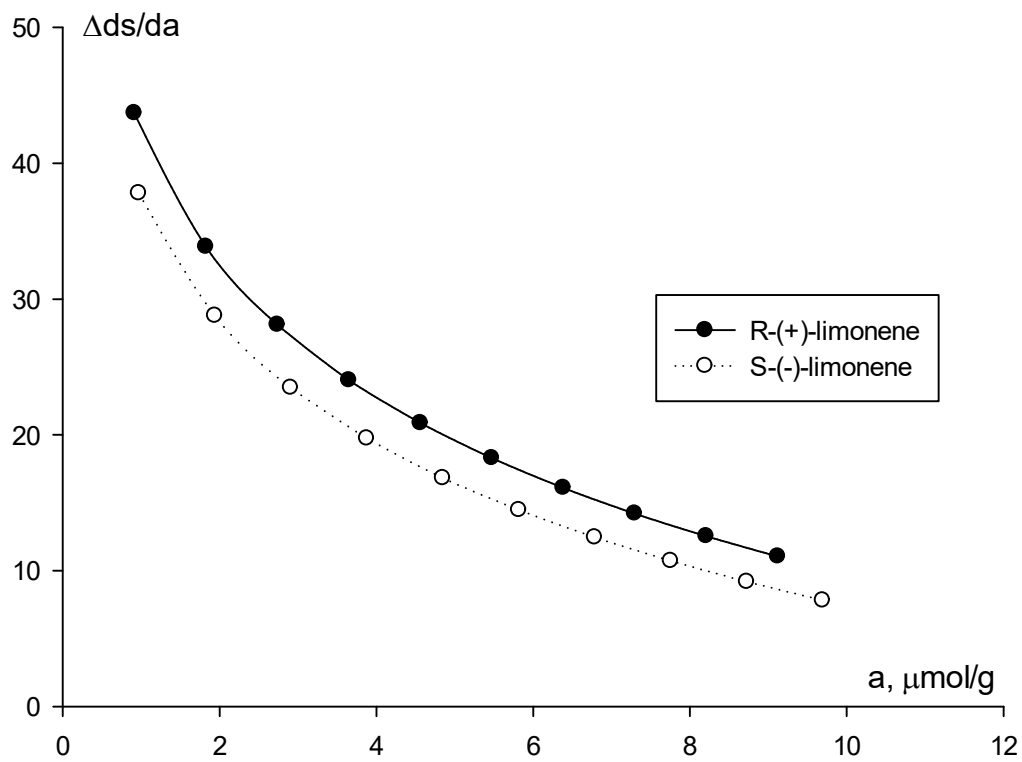

Figure 8S. Differential entropies of limonenes adsorption on CsCuCl<sub>3</sub> crystals at 100 °C

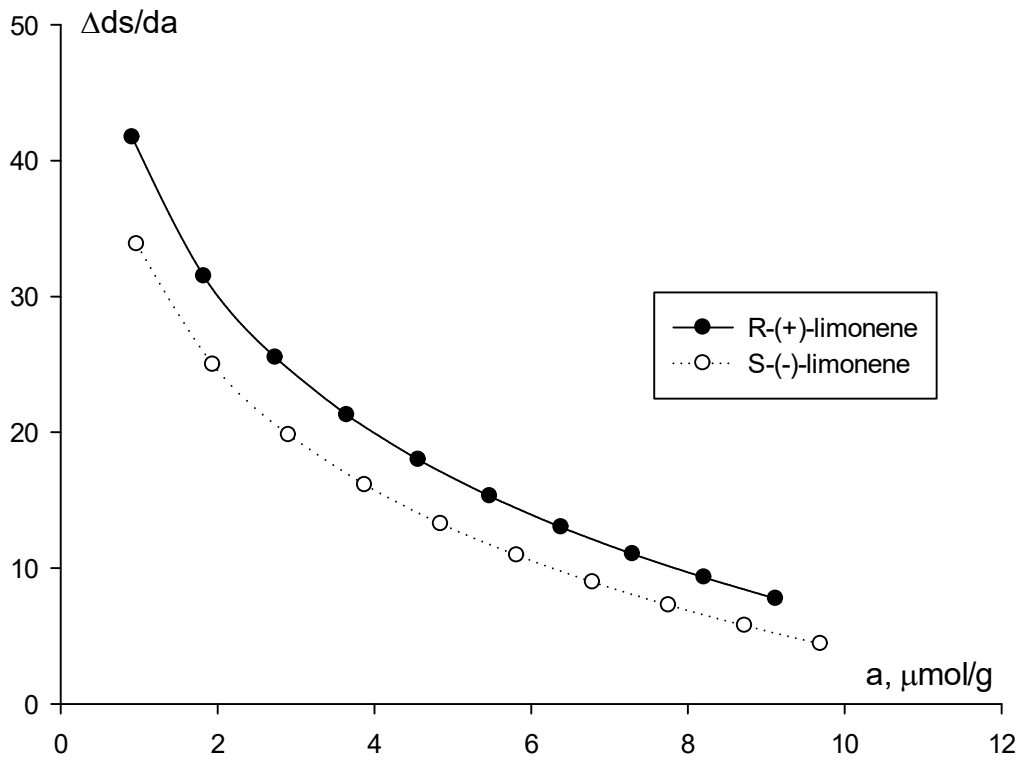

Figure 9S. Differential entropies of limonenes adsorption on CsCuCl<sub>3</sub> crystals at 110 °C

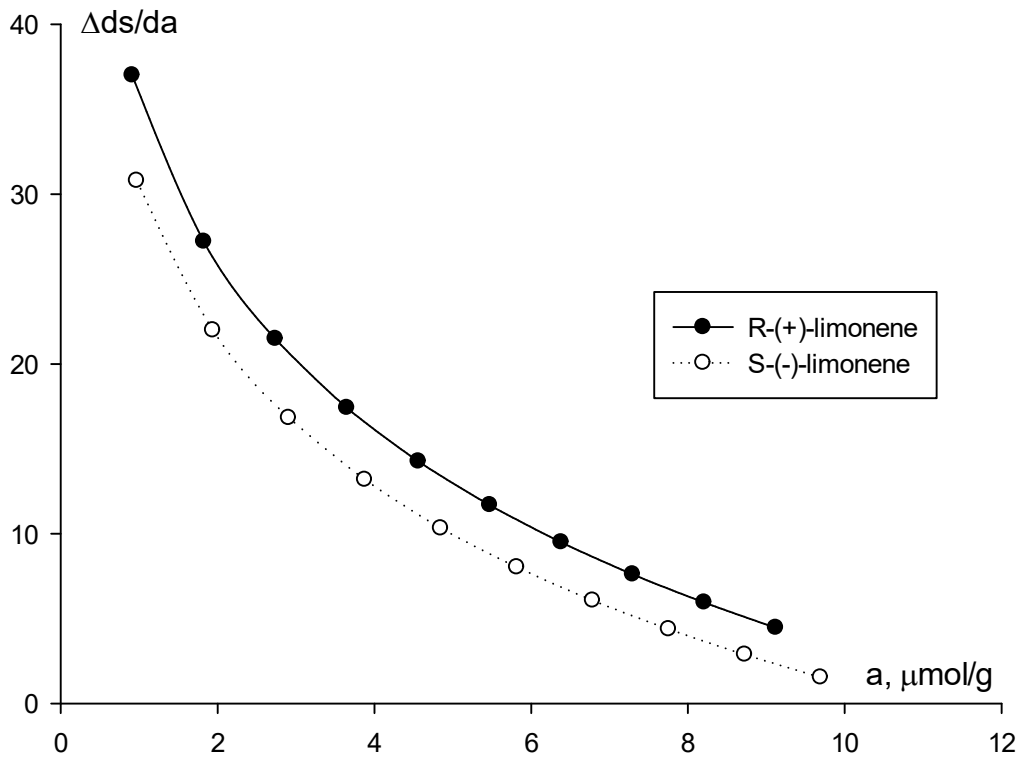

Figure 10S. Differential entropies of limonenes adsorption on CsCuCl<sub>3</sub> crystals at 120 °C

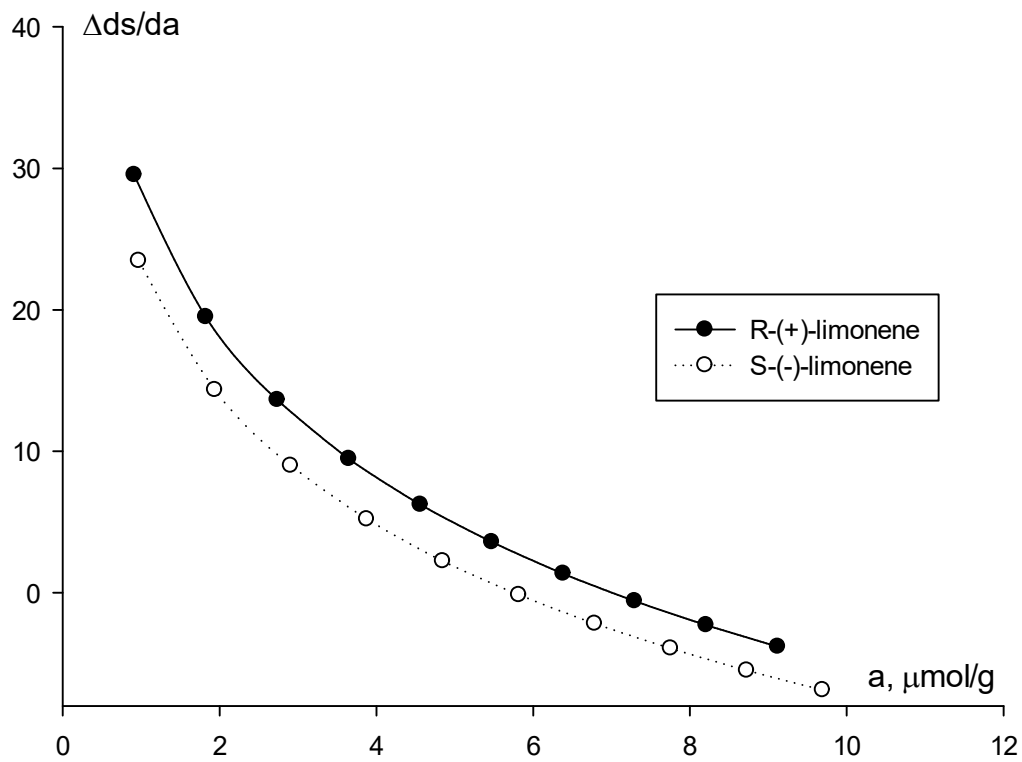

Figure 11S. Differential entropies of limonenes adsorption on CsCuCl<sub>3</sub> crystals at 130 °C

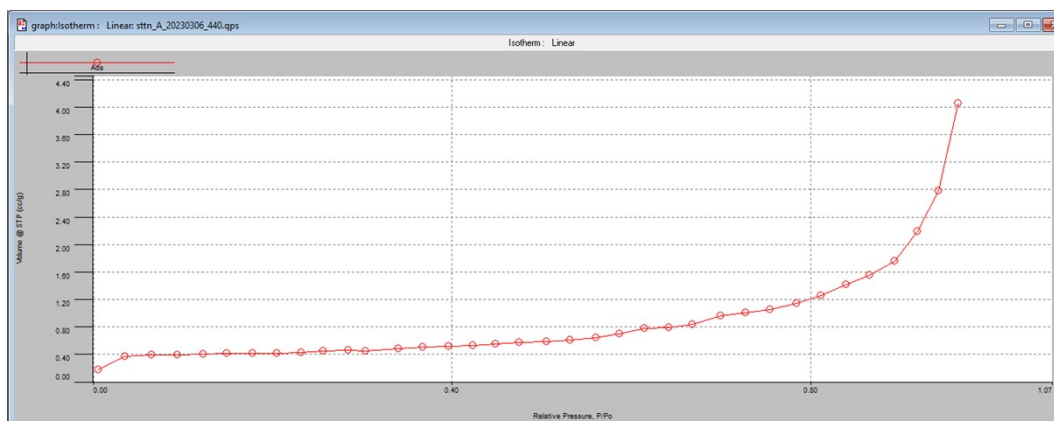

Figure 12S. Nitrogen adsorption isotherm at 77 K

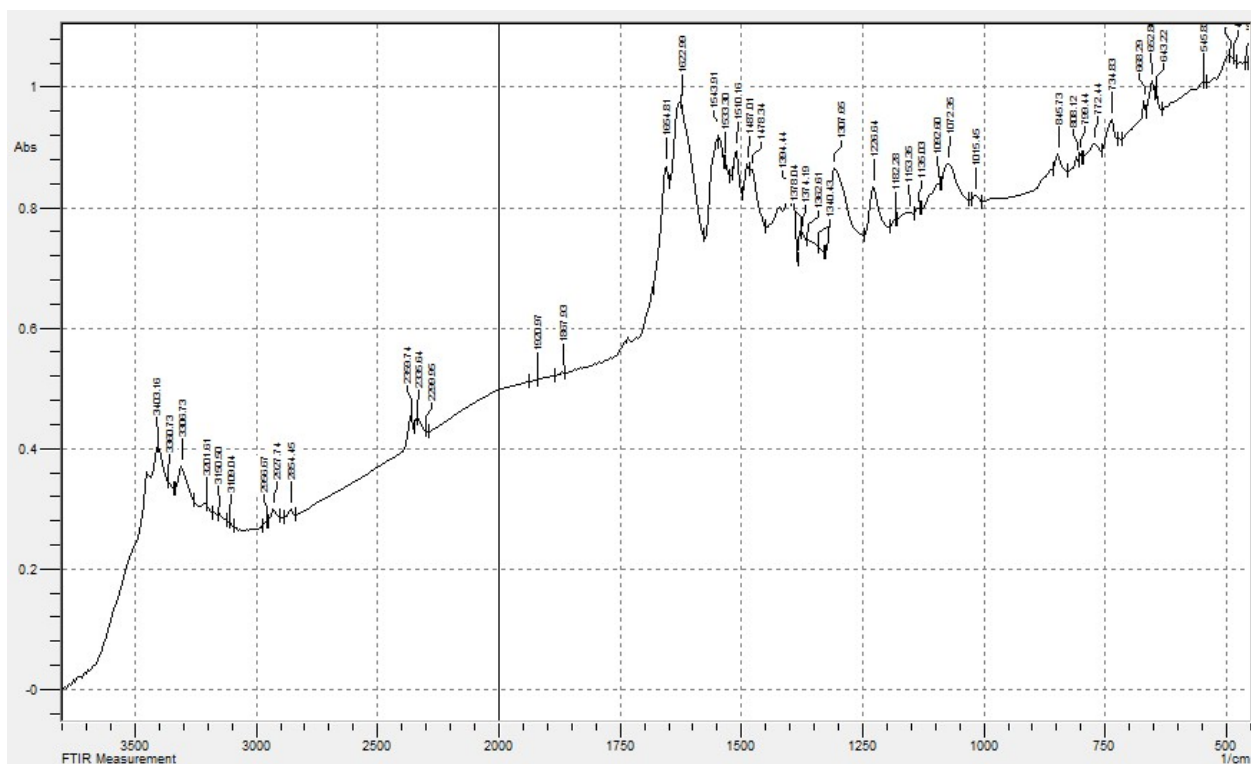

Figure 13S. FTIR spectrum

Table 1S. Approximation parameters for limonenes adsorption isotherms by DR equation.  $W_0$  – icropore volume,  $E$  – characteristic energy

| T, °C | $W_0$          |                | E              |                |
|-------|----------------|----------------|----------------|----------------|
|       | R-(+)-limonene | S-(-)-limonene | R-(+)-limonene | S-(-)-limonene |
| 90    | 0.104          | 0.097          | 13.5           | 13.3           |
| 100   | 0.098          | 0.097          | 12.7           | 12.8           |
| 110   | 0.071          | 0.082          | 13.0           | 12.5           |
| 120   | 0.070          | 0.073          | 12.3           | 12.2           |
| 130   | 0.060          | 0.060          | 12.3           | 12.2           |
| 140   | 0.039          | 0.041          | 13.3           | 13.1           |
| 150   | 0.035          | 0.035          | 13.1           | 13.1           |
| 150   | 0.031          | 0.034          | 14.1           | 13.2           |



Table 3S. P-values for pairs of points of limonenes adsorption isotherms at 100 °C ( $\alpha = 0.05$ ).

| P, Pa | p      | P, Pa | p      | P, Pa | p      |
|-------|--------|-------|--------|-------|--------|
| 36.3  | 0.3928 | 66.1  | 0.3547 | 97.6  | 0.3892 |
| 40.9  | 0.4144 | 70.9  | 0.3718 | 102.3 | 0.4506 |
| 45.7  | 0.4307 | 75.6  | 0.3934 | 107.1 | 0.1604 |
| 50.4  | 0.3679 | 80.3  | 0.3504 | 111.8 | 0.1711 |
| 55.2  | 0.3828 | 86.6  | 0.3513 | 116.6 | 0.3833 |
| 61.4  | 0.3880 | 91.4  | 0.3813 |       |        |

Table 4S. P-values for pairs of points of limonenes adsorption isotherms at 110 °C ( $\alpha = 0.05$ ).

| P, Pa | p      | P, Pa | p      | P, Pa | p      |
|-------|--------|-------|--------|-------|--------|
| 82.3  | 0.1092 | 121.0 | 0.0422 | 159.6 | 0.0137 |
| 90.1  | 0.1282 | 131.2 | 0.0319 | 175.1 | 0.0173 |
| 97.8  | 0.1653 | 136.4 | 0.0101 | 185.3 | 0.0145 |

| P, Pa | p      | P, Pa | p      | P, Pa | p      |
|-------|--------|-------|--------|-------|--------|
| 34.2  | 0.2287 | 58.9  | 0.5974 | 87.6  | 0.9556 |
| 38.3  | 0.2064 | 63.0  | 0.5264 | 91.7  | 0.9664 |
| 42.4  | 0.8211 | 67.1  | 0.4755 | 95.8  | 0.8981 |
| 46.5  | 0.9771 | 71.2  | 0.9057 | 100.0 | 0.8363 |
| 50.6  | 0.6567 | 79.4  | 0.7906 | 104.1 | 0.7825 |
| 54.8  | 0.6841 | 83.5  | 0.8735 | 110.9 | 0.9361 |
| 105.5 | 0.0391 | 144.2 | 0.0113 | 193.0 | 0.0159 |
| 113.2 | 0.0422 | 151.9 | 0.0124 | 200.8 | 0.0175 |

Table 5S. P-values for pairs of points of limonenes adsorption isotherms at 120 °C ( $\alpha = 0.05$ ).

| P, Pa | p      | P, Pa | p      | P, Pa | p      |
|-------|--------|-------|--------|-------|--------|
| 77.0  | 0.0013 | 154.0 | 0.0314 | 267.5 | 0.0290 |
| 88.0  | 0.0027 | 165.0 | 0.0377 | 278.5 | 0.0372 |
| 99.0  | 0.0046 | 176.0 | 0.0463 | 289.5 | 0.0372 |
| 121.0 | 0.0163 | 245.5 | 0.0228 | 300.5 | 0.0447 |
| 132.0 | 0.0321 | 256.5 | 0.0275 |       |        |

Table 6S. P-values for pairs of points of limonenes adsorption isotherms at 130 °C ( $\alpha = 0.05$ ).

| P, Pa | p      | P, Pa | p       | P, Pa | p      |
|-------|--------|-------|---------|-------|--------|
| 123.0 | 0.2147 | 245.9 | 0.0569  | 338.2 | 0.0141 |
| 138.3 | 0.2854 | 261.3 | 0.06865 | 353.5 | 0.0175 |
| 153.7 | 0.3835 | 276.7 | 0.08947 | 368.9 | 0.0200 |
| 169.1 | 0.4929 | 292.0 | 0.1103  | 384.3 | 0.0251 |
| 215.2 | 0.0367 | 307.4 | 0.1469  | 415.0 | 0.0418 |
| 230.6 | 0.0444 | 322.8 | 0.0122  |       |        |
